# Supplementary material for: Altered expression of the L-arginine/nitric oxide pathway in ovarian cancer: metabolic biomarkers and biological implications
Source: PubMed Central journal article supplement (PMC10492322; doi:10.1186/s12885-023-11192-8), 2023-09-08

### **Gene expression correlation network analysis**

The significant functional module component genes were visualized using Cytoscape[1]. Each gene was represented by a node. Based on the spearman rank correlation matrix among component genes, the correlation structure between the genes was extracted using a Minimum Spanning Tree (MST), where the length of the edges were proportional to the correlation coefficient between the two nodes. The fold change of gene expression level ( $\log_2(\text{FC})$ ) and  $p$  value ( $-\log_{10}(p)$ ) are also showed by node color and size, respectively.

The gene correlation tree inside a functional module is extracted from whole network of 11 functional modules separately. Only the genes with  $p < 0.05$  are labelled.

[1] Shannon P, Markiel A, Ozier O, Baliga NS, Wang JT, Ramage D, Amin N, Schwikowski B, Ideker T. Cytoscape: a software environment for integrated models of biomolecular interaction networks. *Genome Res.* 2003 Nov;13(11):2498-504. doi: 10.1101/gr.1239303.

## 2. Non-homologous end-joining

2A) Normal vs Early OC

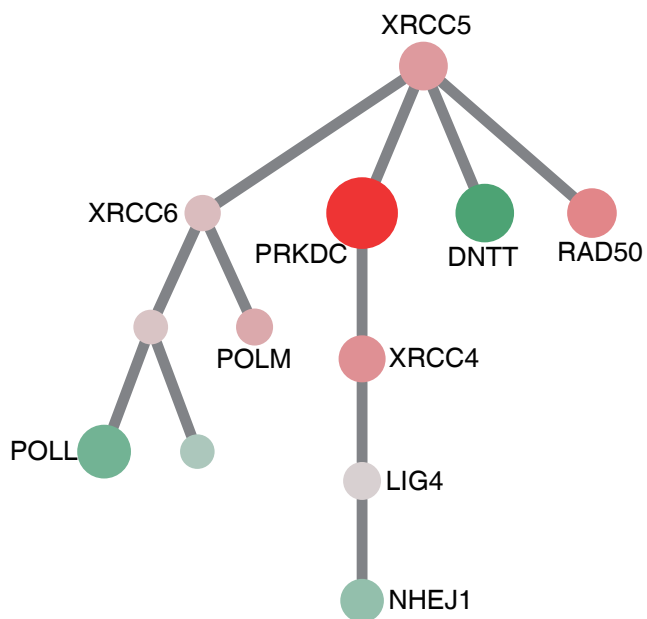

2B) Early vs Late OC

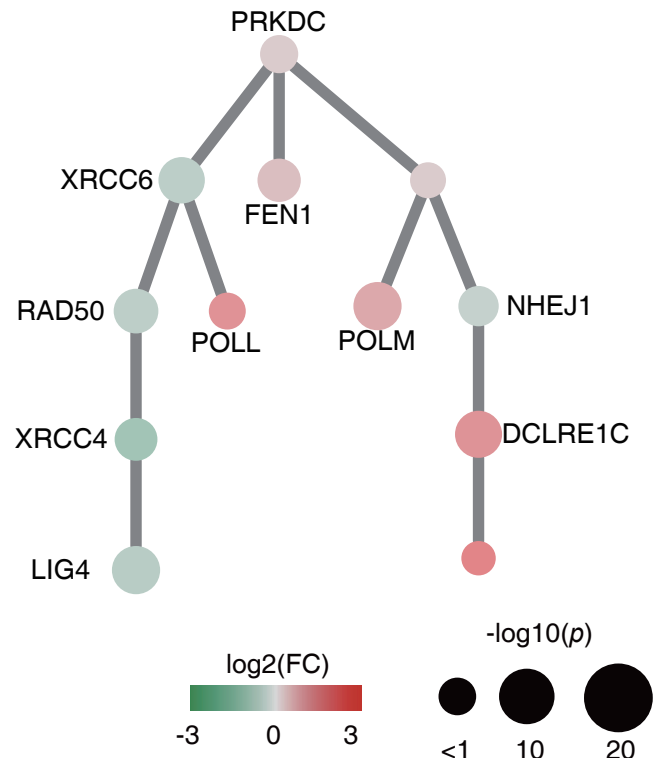

## 3. Phenylalanine, tyrosine and tryptophan biosynthesis

3A) Normal vs Early OC

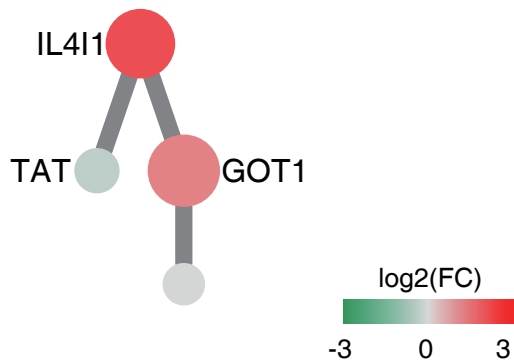

3B) Early vs Late OC

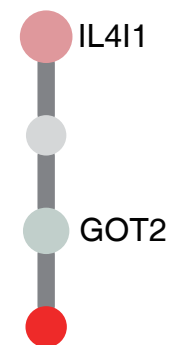



# 5. Base excision repair

## 5A) Normal vs Early OC

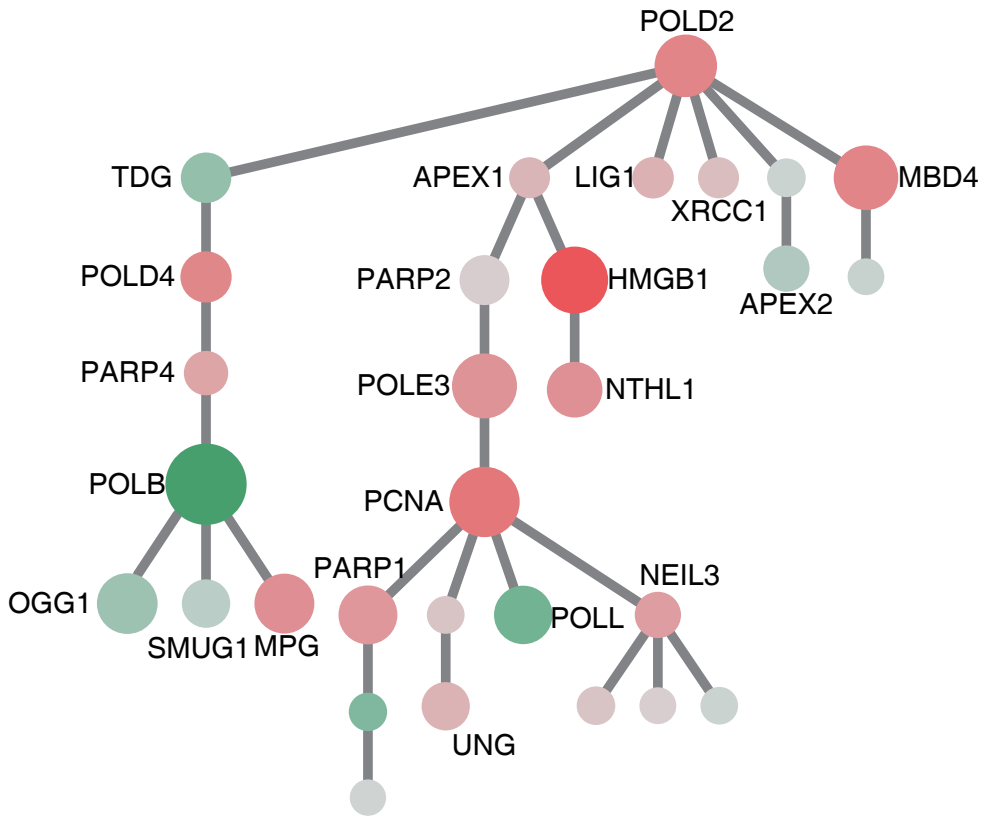

## 5B) Early vs Late OC

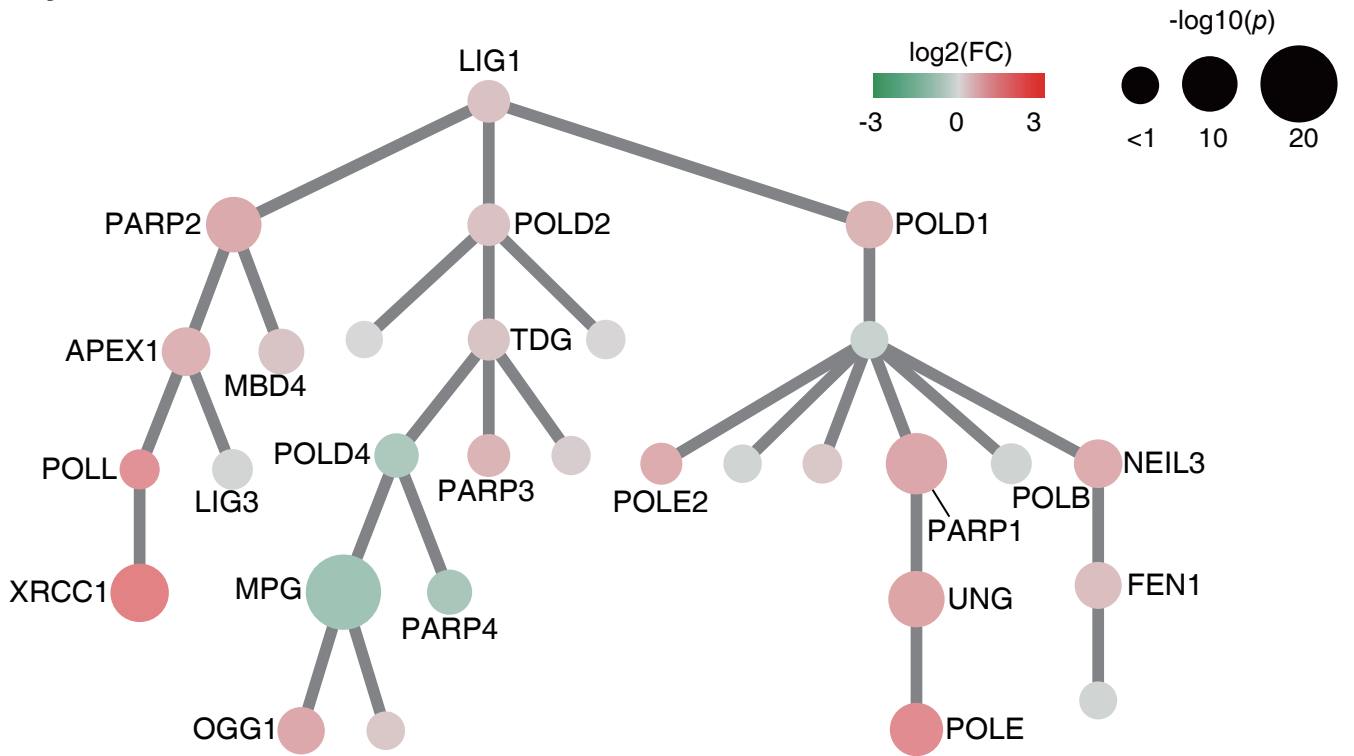



|              |             |              |              |              |              |
|--------------|-------------|--------------|--------------|--------------|--------------|
| 1: UBE2A     | 45: RFC5    | 89: USP1     | 133: MSH6    | 177: RAD51   | 220: BRCA1   |
| 2: TDP1      | 46: HLTF    | 90: POLD3    | 134: MORF4L1 | 178: PARP1   | 221: FANCI   |
| 3: RFC1      | 47: RFC4    | 91: LIG1     | 135: MGMT    | 179: CDC25A  | 222: BLM     |
| 4: CUL3      | 48: RAD52   | 92: DDB1     | 136: AP5M1   | 180: EXO1    | 223: BCAS2   |
| 5: YWHAB     | 49: TTI1    | 93: RECQL4   | 137: MMS19   | 181: MLH3    | 224: UBE2NL  |
| 6: POLR2F    | 50: RAD54L  | 94: RAD51C   | 138: XRCC2   | 182: ERCC6   | 225: RAD9A   |
| 7: EXD2      | 51: RBX1    | 95: PPP6R1   | 139: FANCE   | 183: ERCC1   | 226: POLR2E  |
| 8: XRCC5     | 52: RBBP8   | 96: ATRIP    | 140: CCNH    | 184: NTHL1   | 227: POLR2A  |
| 9: TDP2      | 53: RAD54L2 | 97: POLB     | 141: AP5Z1   | 185: DUT     | 228: BAG6    |
| 10: RAD23B   | 54: CLSPN   | 98: ERCC2    | 142: LIG4    | 186: POLQ    | 229: POLR2J  |
| 11: XRCC3    | 55: ZFYVE26 | 99: PMS2     | 143: SAMHD1  | 187: DMC1    | 230: PARP2   |
| 12: XRCC1    | 56: RAD51D  | 100: POLR2K  | 144: LIG3    | 188: ERCC5   | 231: BABAM1  |
| 13: ZCWPW1   | 57: TOP3A   | 101: PLK3    | 145: VPS4B   | 189: DDB2    | 232: ATR     |
| 14: PNKP     | 58: ERCC8   | 102: RFC3    | 146: POLD2   | 190: TOPBP1  | 233: DCLRE1C |
| 15: WEE1     | 59: RAD51B  | 103: PER2    | 147: KANK3   | 191: RPA4    | 234: ATM     |
| 16: WDR48    | 60: XPC     | 104: RRM2    | 148: HUS1    | 192: DCLRE1A | 235: XRCC4   |
| 17: VPS4A    | 61: POLR2D  | 105: POLE3   | 149: PLS3    | 193: REV1    | 236: ASCC3   |
| 18: MSH4     | 62: NSMCE4A | 106: CCNO    | 150: HSF2BP  | 194: PPP4R1  | 237: PMS1    |
| 19: UNG      | 63: NEIL3   | 107: PARP4   | 151: RRM1    | 195: CUL5    | 238: KANK1   |
| 20: UBE2N    | 64: EXO5    | 108: POLM    | 152: MPG     | 196: RPA1    | 239: APTX    |
| 21: UIMC1    | 65: WDR70   | 109: PARP3   | 153: MDC1    | 197: CUL4B   | 240: XRCC6   |
| 22: APEX2    | 66: RECQL   | 110: OGG1    | 154: HES1    | 198: HMGB1   | 241: ERCC3   |
| 23: UBL4A    | 67: PPP6R2  | 111: NUDT1   | 155: FAN1    | 199: CUL4A   | 242: APEX1   |
| 24: UBE2V2   | 68: PPP4R4  | 112: NUDT18  | 156: HERC2   | 200: CHEK2   | 243: PPP6C   |
| 25: TTI2     | 69: PPP4R2  | 113: SMUG1   | 157: UBE2B   | 201: RAD54B  | 244: AP5S1   |
| 26: TP53     | 70: POLR2L  | 114: NHEJ1   | 158: RAD23A  | 202:         | 245: MBD4    |
| 27: TOP3B    | 71: YWHAZ   | 115: SPG11   | 159: NEK11   | RAD51AP1     | 246: ANKRD28 |
| 28: WRAP53   | 72: NUDT15  | 116: NEK1    | 160: ERCC4   | 203: RAD1    | 247: PER3    |
| 29: MUTYH    | 73: NEK4    | 117: CETN2   | 161: GTF2H5  | 204: POLE2   | 248: AEN     |
| 30: FANCG    | 74: MLH1    | 118: SPIDR   | 162: TELO2   | 205: BRCA2   |              |
| 31: TIMELESS | 75: SSBP1   | 119: NBN     | 163: GTF2H4  | 206: BARD1   |              |
| 32: YWHAQ    | 76: PPP4C   | 120: REV3L   | 164: YWHAH   | 207: CHEK1   |              |
| 33: TDG      | 77: POLR2I  | 121: NAV2    | 165: RAD17   | 208: MNAT1   |              |
| 34: SYCP2    | 78: POLR2H  | 122: MYBBP1A | 166: GTF2H3  | 209: CDK7    |              |
| 35: SPO11    | 79: POLR2G  | 123: YWHAE   | 167: GTF2H2  | 210: MSH2    |              |
| 36: WDR76    | 80: POLR2C  | 124: PRPF19  | 168: XPA     | 211: CDC5L   |              |
| 37: RECQL5   | 81: POLR2B  | 125: DNTT    | 169: FANCF   | 212: POLD1   |              |
| 38: SMCHD1   | 82: POLI    | 126: MUS81   | 170: GTF2H1  | 213: CDC25B  |              |
| 39: SMC6     | 83: POLH    | 127: MSH5    | 171: SMC5    | 214: RMI1    |              |
| 40: RPA3     | 84: FANCC   | 128: RAD50   | 172: FANCL   | 215: PCNA    |              |
| 41: RPA2     | 85: FANCA   | 129: MSH3    | 173: TIPIN   | 216: BRIP1   |              |
| 42: RNF8     | 86: POLE    | 130: RFC2    | 174: FEN1    | 217: KANK2   |              |
| 43: PALB2    | 87: WRN     | 131: PRKDC   | 175: DCLRE1B | 218: DONSON  |              |
| 44: POLL     | 88: POLD4   | 132: PPP6R3  | 176: CDC25C  | 219: BRCC3   |              |

# 7. Homologous recombination

## 7A) Normal vs Early OC

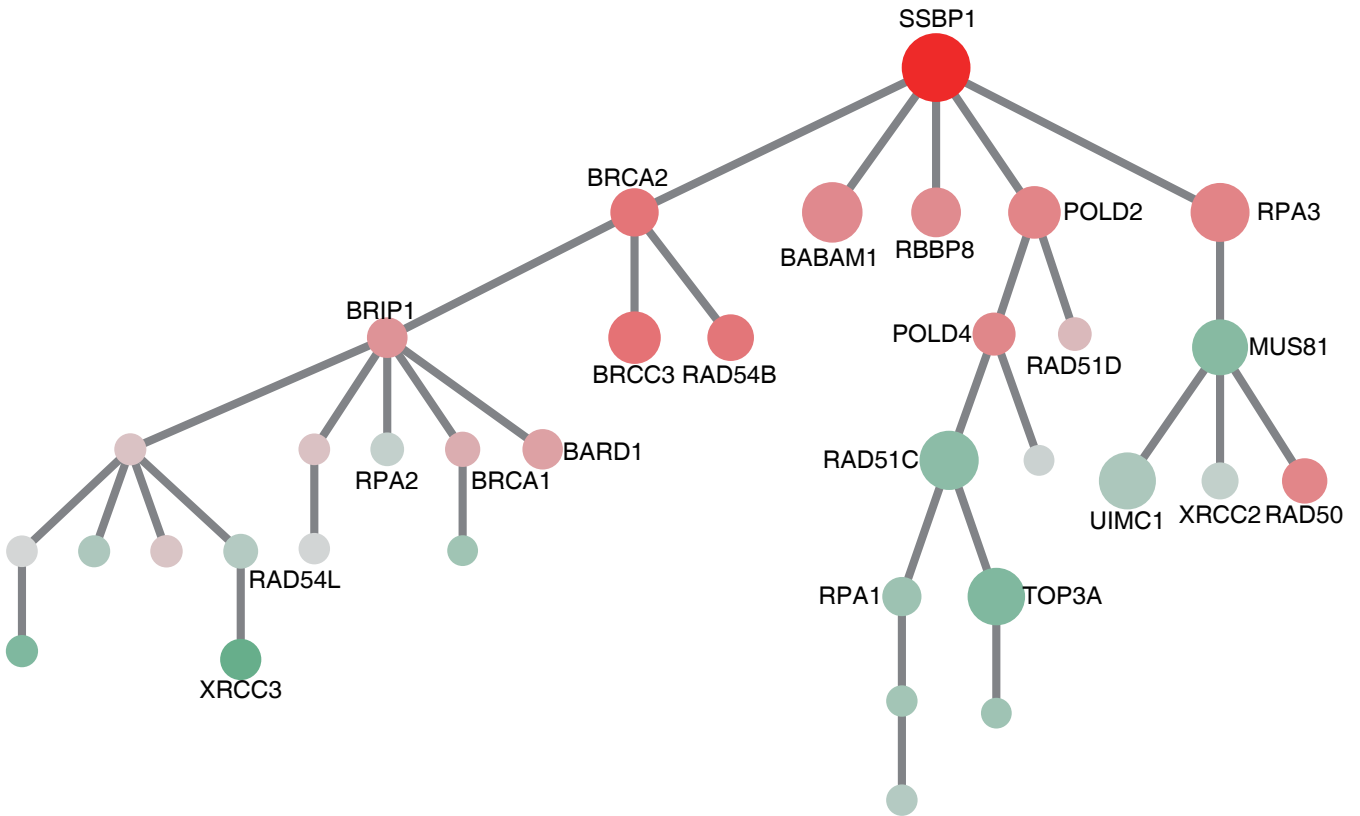

## 7B) Early vs Late OC

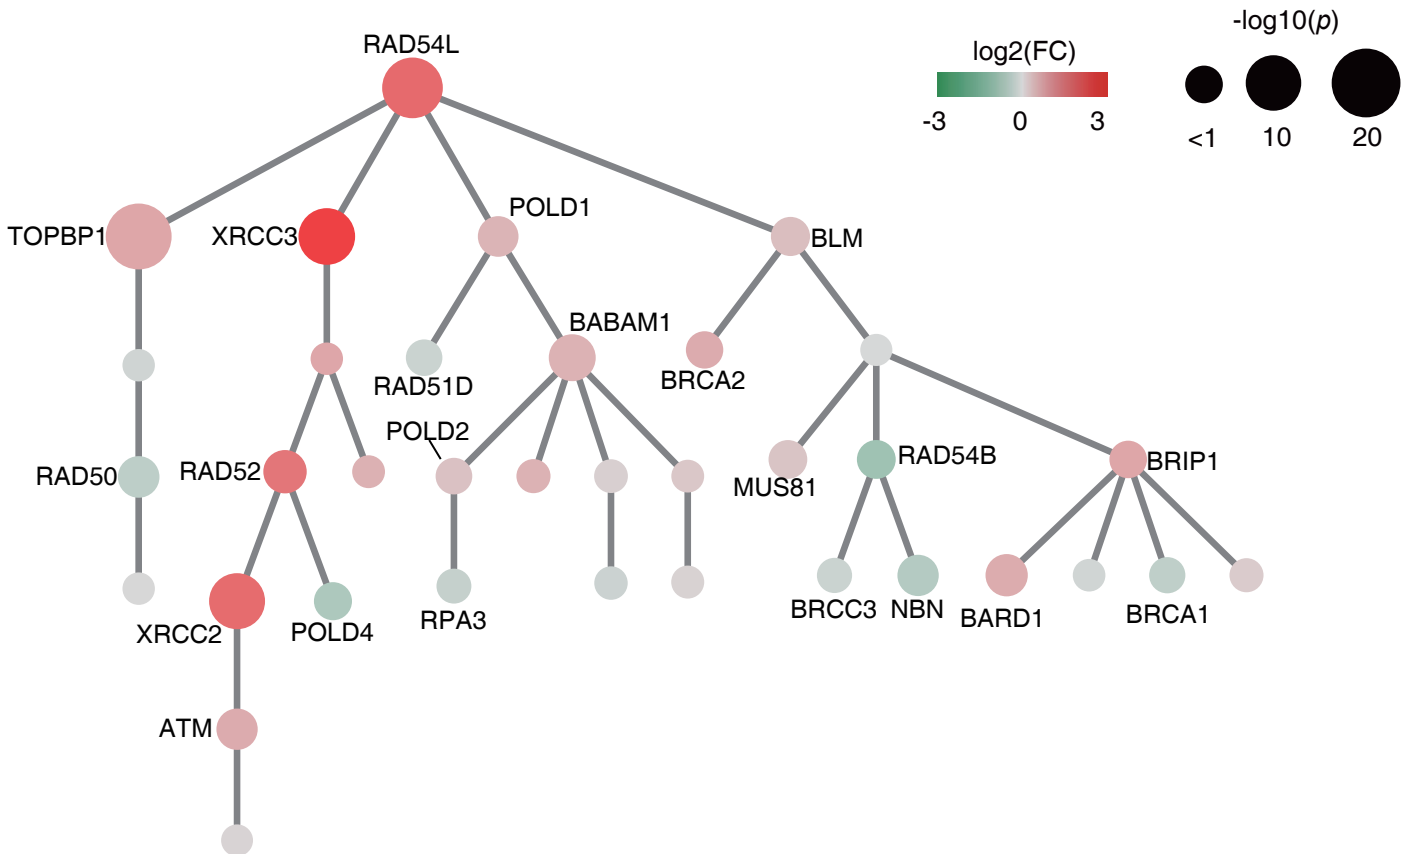

## 8. Ribosome biogenesis in eukaryotes

### 8A) Normal vs Early OC

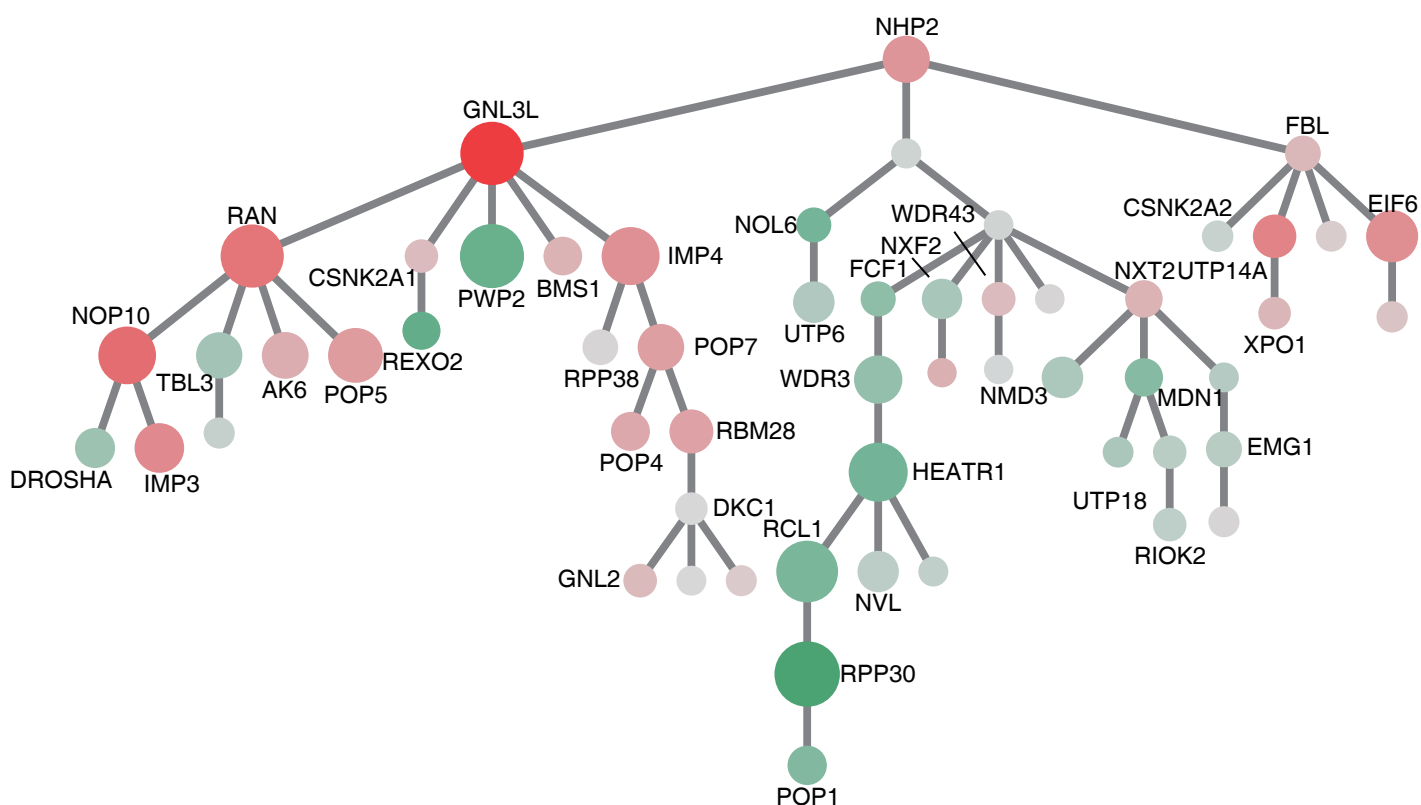

### 8B) Early vs Late OC

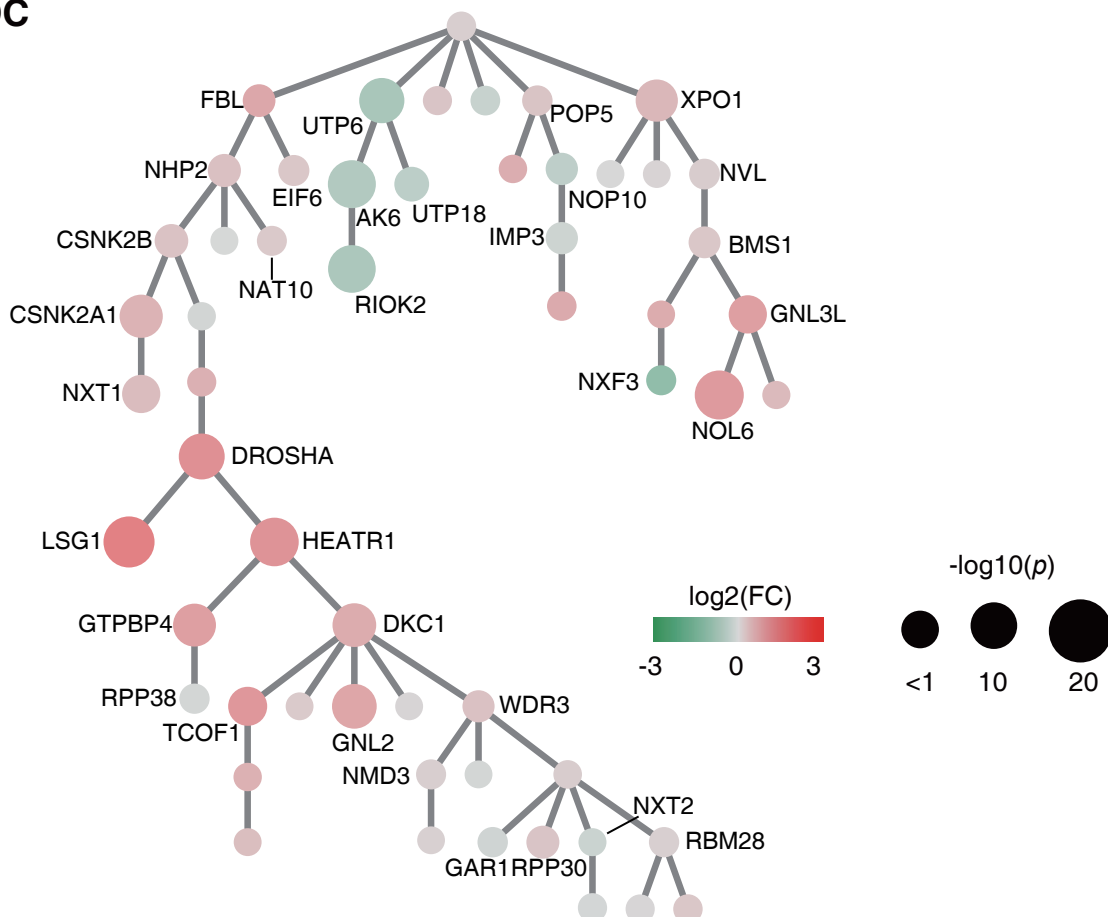



# 9. Sphingolipid metabolism

## 9A) Normal vs Early OC

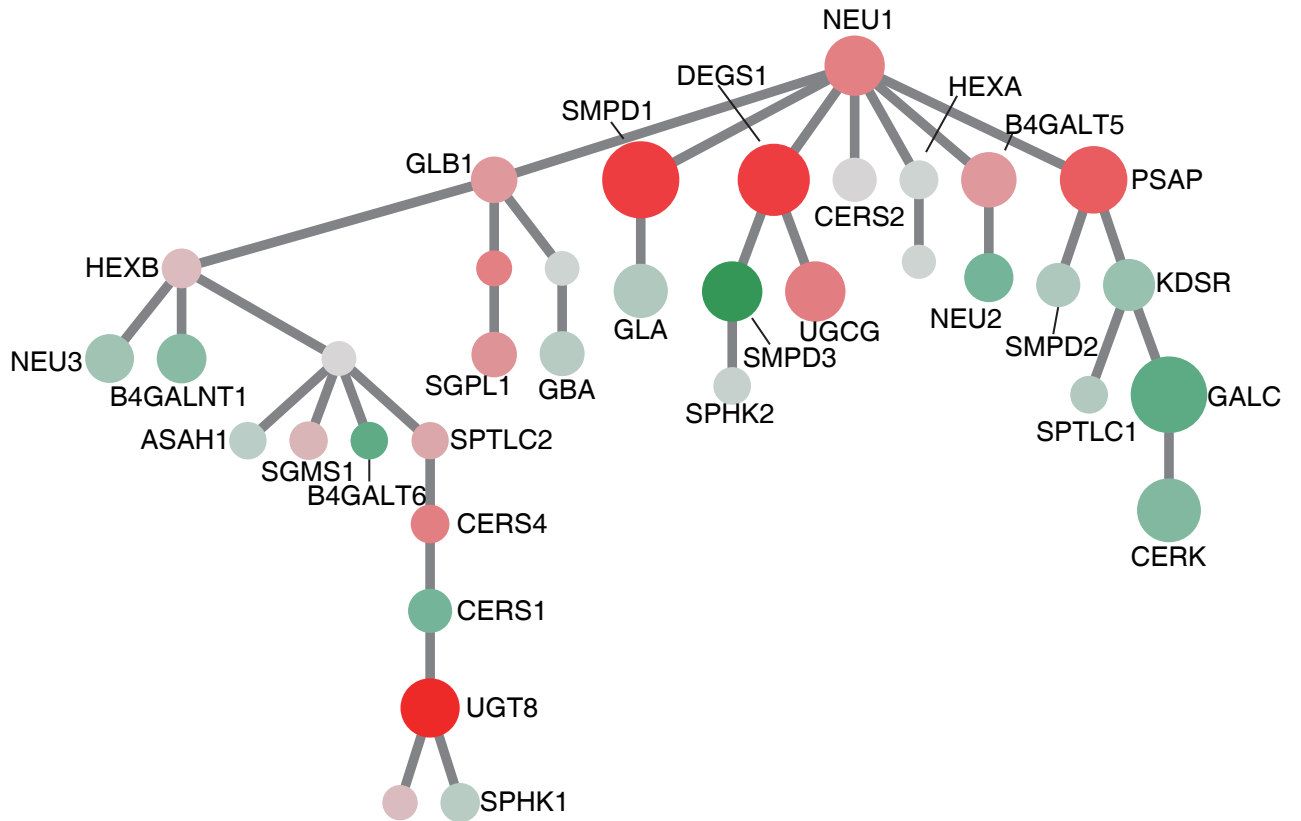

## 9B) Early vs Late OC

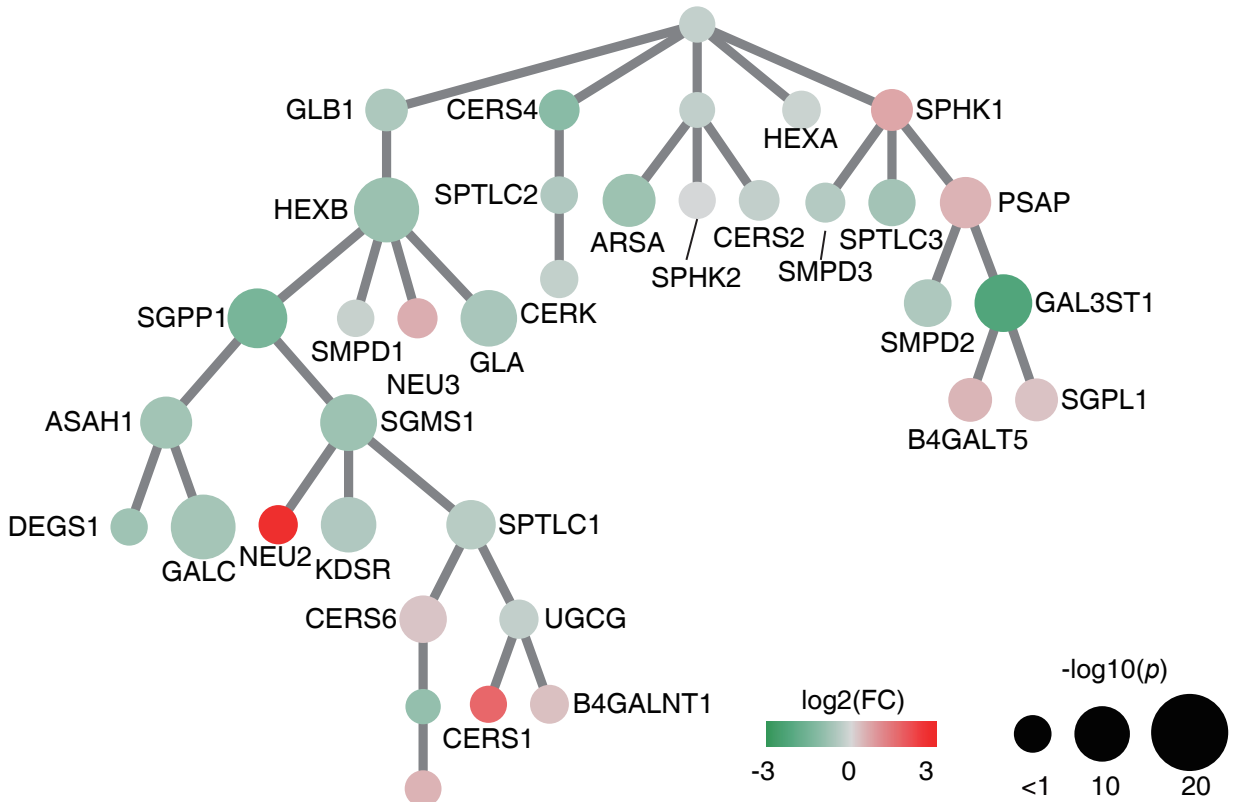



# 11. Histidine metabolism

## 11A) Normal vs Early OC

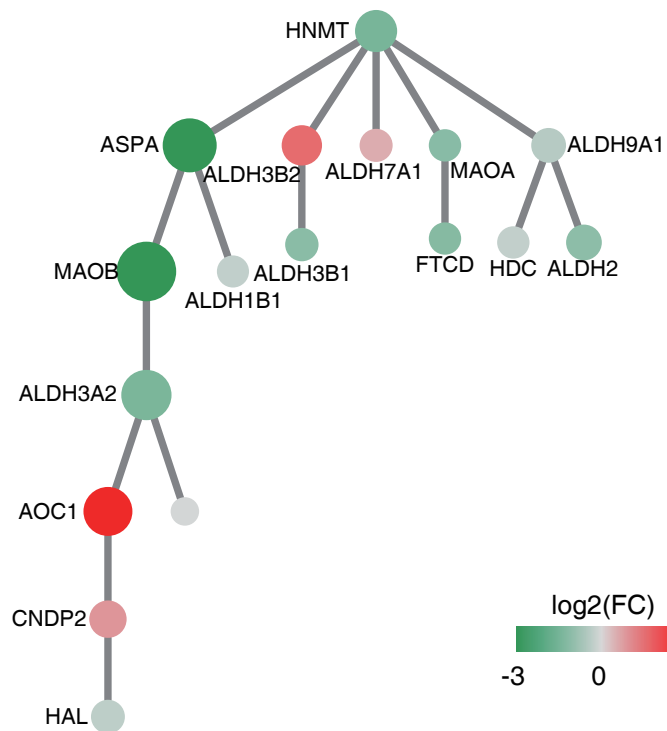

## 11B) Early vs Late OC

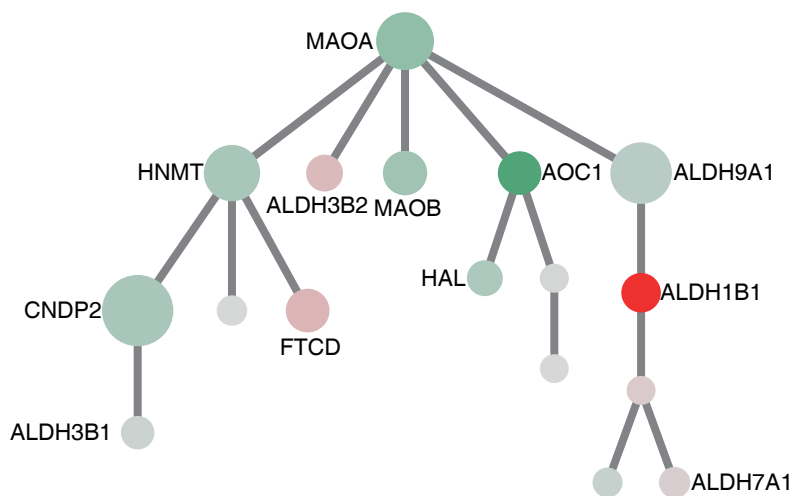

Supplement: 12885_2023_11192_MOESM1_ESM.pdf [file 12885_2023_11192_MOESM1_ESM.pdf]
